# Supplementary material
Source: Springer Nature journal article supplement (https://www.springermedizin.de/resource/supplementary/12997_2011_76_MOESM3_ESM.pdf/9623270)

Resolved Improved No change/Worsened

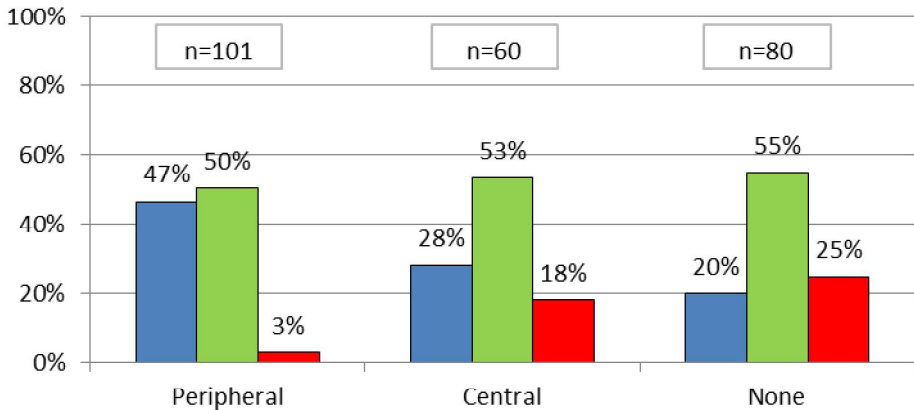

Supplement: MOESM3 [file 9623270]
